# Supplementary material for: Changes in the peripheral blood cell count in pediatric patients with Down syndrome
Source: PubMed Central journal article supplement — J Int Med Res. 2019 May 27;47(8):3757–62. doi: 10.1177/0300060519850397 (PMC6726775; doi:10.1177/0300060519850397), 2019-05-27
Supplement: Supplemental_Material.pdf [file Supplemental_Material.pdf]

**Supplementary Table 1S.** Demographic and clinical data of patients with hypothyroidism

| ID | Age (month) | Sex | Thyroid function |              |              |
|----|-------------|-----|------------------|--------------|--------------|
|    |             |     | TSH (uUI/ml)     | FT4 (pmol/l) | FT3 (pmol/l) |
| 1  | 24          | M   | 7,46 ↑           | 23,78 ↑      | 8,94         |
| 2  | 12          | M   | 2,07             | 17,7         | 7,87         |
| 3  | 114         | M   | 100 ↑            | 6,21 ↓       | 1,81 ↓       |
| 4  | 13          | F   | 2,85             | 19,63        | 7,34         |
| 5  | 170         | F   | 6,93             | 13,97        | 7,78         |
| 6  | 24          | F   | 12,62 ↑          | 16,82        | 8,51         |
| 7  | 1           | F   | 8,88 ↑           | 18,01        | 7,85         |
| 8  | 34          | M   | 5,23 ↑           | 17,74        | 9,73 ↑       |
| 9  | 1           | F   | 3,19             | 19,89        | 6,82         |
| 10 | 5           | F   | 2,63             | 14,65        | 5,41         |
| 11 | 43          | F   | 4,66 ↑           | 19,58        | 5,5          |
| 12 | 59          | M   | 4,84 ↑           | 15,95        | 8,45         |
| 13 | 2           | F   | 9,99 ↑           | 15,86        | 7,25         |
| 14 | 163         | F   | 1,41             | 19,08        | 6,11         |
| 15 | 70          | M   | 5,7 ↑            | -            | -            |
| 16 | 157         | F   | 100 ↑            | -            | 4,21         |
| 17 | 3           | F   | 100 ↑            | 0,536 ↓      | 2,1 ↓        |

M – male; F – female; TSH – thyroid stimulating hormone; FT3 – free triiodothyronine; FT4 – free thyroxine; ↑ - abnormal value, increased; ↓ - abnormal value, decreased; normal values are found in the supplementary table 8.

**Supplementary Table 2S.** Cell blood count of patients with hypothyroidism

| ID | Eosinophils          |        | Basophils            |     | Monocytes            |        | Neutrophils          |        | Lymphocytes          |        | Erythrocytes         | Platelets            |
|----|----------------------|--------|----------------------|-----|----------------------|--------|----------------------|--------|----------------------|--------|----------------------|----------------------|
|    | x10 <sup>3</sup> /ul | %      | x10 <sup>3</sup> /ul | %   | x10 <sup>3</sup> /ul | %      | x10 <sup>3</sup> /ul | %      | x10 <sup>3</sup> /ul | %      | x10 <sup>6</sup> /ul | x10 <sup>3</sup> /ul |
| 1  | 0,53 ↑               | 5,5 ↑  | 0,05                 | 0,5 | 0,86                 | 9 ↑    | 3,29                 | 34,3   | 4,86                 | 50,7   | 4,7                  | 289                  |
| 2  | 0,64                 | 7,4 ↑  | 0,06                 | 0,7 | 0,8                  | 9,2 ↑  | 1,54                 | 17,8 ↓ | 5,61                 | 64,9   | 4,8                  | 416                  |
| 3  | 0,53 ↑               | 7,3 ↑  | 0,05                 | 0,7 | 0,48                 | 6,6 ↑  | 2,45                 | 33,7 ↓ | 3,76                 | 51,7 ↑ | 4,87                 | 199                  |
| 4  | 0,05 ↓               | 0,7 ↓  | 0,02                 | 0,3 | 0,68                 | 9,9 ↑  | 2,58                 | 37,5   | 3,55                 | 51,6   | 4,61                 | 284                  |
| 5  | 0,05 ↓               | 1 ↓    | 0,01                 | 0,2 | 0,37                 | 7,3    | 2,15                 | 42,2   | 2,51                 | 49,3 ↑ | 4,48                 | 195                  |
| 6  | 0,57                 | 3,4    | 0,04                 | 0,2 | 1,88                 | 11,3 ↑ | 3,34                 | 20,2   | 10,79                | 64,9   | 3,18 ↓               | 553 ↑                |
| 7  | 0,29                 | 3,1    | 0,02                 | 0,2 | 1,17                 | 12,3 ↑ | 0,61 ↓               | 6,4 ↓  | 7,39                 | 78 ↑   | 4,25                 | 203                  |
| 8  | 0,28                 | 3,1 ↓  | 0,02                 | 0,2 | 0,59                 | 6,6    | 2,48                 | 27,7   | 5,59                 | 62,4   | 4,82                 | 343                  |
| 9  | 1,02 ↑               | 10,2 ↑ | 0,05                 | 0,5 | 0,91                 | 9,1 ↑  | 2,28                 | 22,6 ↓ | 5,78                 | 57,6 ↑ | 3,99 ↓               | 308                  |
| 10 | 0,25                 | 3,1    | 0,02                 | 0,3 | 0,68                 | 8,6 ↑  | 1,12                 | 14 ↓   | 5,88                 | 74     | 4,26                 | 196                  |
| 11 | 0,59 ↑               | 6,4 ↑  | 0,04                 | 0,4 | 0,6                  | 6,5    | 2,71                 | 29,5   | 5,26                 | 57,2   | 4,15                 | 433                  |
| 12 | 0,18                 | 2,5    | 0,02                 | 0,3 | 0,67                 | 9,4 ↑  | 3,68                 | 52 ↑   | 2,54                 | 35,8 ↓ | 4,72                 | 262                  |
| 13 | 0,42                 | 3,7    | 0,07                 | 0,6 | 1,38                 | 12,1 ↑ | 2,48                 | 21,9   | 7,02                 | 61,7   | 3,47 ↓               | 314                  |
| 14 | 0,17                 | 3      | 0,04                 | 0,7 | 0,61                 | 10,9 ↑ | 2,61                 | 46,4   | 2,19                 | 39     | 4,31                 | 231                  |
| 15 | 0,39                 | 3      | 0,07                 | 0,5 | 0,98                 | 7,5    | 5,5 ↑                | 42,4   | 6,05                 | 46,6   | 4,8                  | 396                  |
| 16 | 0,12                 | 1,9 ↓  | 0,06                 | 0,9 | 0,61                 | 9,5 ↑  | 3,36                 | 52,1   | 2,29                 | 35,6   | 4,54                 | 309                  |
| 17 | 0,1                  | 0,8 ↓  | 0,07                 | 0,6 | 0,73                 | 5,8    | 2,23                 | 17,8 ↓ | 9,41                 | 75     | 3,6 ↓                | 293                  |

↑ - abnormal value, increased; ↓ - abnormal value, decreased; normal values are found in the supplementary table 7.

**Supplementary Table 3S.** Demographic and clinical data of patients with Down syndrome and hypothyroidism

| ID | Age (month) | Sex | Thyroid function |              |              |
|----|-------------|-----|------------------|--------------|--------------|
|    |             |     | TSH (uUI/ml)     | FT4 (pmol/l) | FT3 (pmol/l) |
| 18 | 3           | F   | 1,11             | 22,7         | 7,33         |
| 19 | 19          | M   | 7,74↑            | 18,26        | 6,81         |
| 20 | 90          | M   | 37,7↑            | 13,36        | 5,4          |
| 21 | 92          | M   | 4,92↑            | 17,74        | 6,86         |
| 22 | 143         | M   | 5,41↑            | 16,99        | 6,75         |
| 23 | 138         | F   | 3,87             | 14,88        | 7,06         |
| 24 | 40          | F   | 15,89↑           | 11,45        | -            |
| 25 | 19          | M   | 2,72             | 21,02        | 4,92         |
| 26 | 209         | F   | 0,168            | 18,72        | 3,36         |
| 27 | 43          | F   | 3,13             | 21,66        | 6,37         |
| 28 | 138         | M   | 3,69↑            | 14,93        | 5,88         |
| 29 | 187         | M   | 14,87↑           | 14,61        | -            |
| 30 | 77          | M   | 8,6↑             | 15,69        | 8,09↑        |

*M – male; F – female; TSH – thyroid stimulating hormone; FT3 – free triiodothyronine; FT4 – free thyroxine; ↑ - abnormal value, increased; normal values are found in the supplementary table 8.*

**Supplementary Table 4S.** Cell blood count of patients with Down syndrome and hypothyroidism

| ID | Eosinophils          |      | Basophils            |      | Monocytes            |       | Neutrophils          |       | Lymphocytes          |       | Erythrocytes         | Platelets            |
|----|----------------------|------|----------------------|------|----------------------|-------|----------------------|-------|----------------------|-------|----------------------|----------------------|
|    | x10 <sup>3</sup> /ul | %    | x10 <sup>3</sup> /ul | %    | x10 <sup>3</sup> /ul | %     | x10 <sup>3</sup> /ul | %     | x10 <sup>3</sup> /ul | %     | x10 <sup>6</sup> /ul | x10 <sup>3</sup> /ul |
| 18 | 0,08↓                | 1,3↓ | 0,1                  | 1,7↑ | 0,89                 | 14,7↑ | 1,91                 | 31,6  | 3,06                 | 50,7  | 3,33↓                | 374                  |
| 19 | 0,07↓                | 1,2↓ | 0,01                 | 0,2  | 0,33                 | 5,7   | 1,88                 | 32,8  | 3,45                 | 60,1  | 4,48                 | 274                  |
| 20 | 0,17                 | 1,7↓ | 0,04                 | 0,4  | 0,74                 | 7,5   | 6,71                 | 68,4↑ | 2,16                 | 22↓   | 4,01                 | 228                  |
| 21 | 0,02↓                | 0,5↓ | 0,03                 | 0,7  | 0,41                 | 9,9↑  | 1,78                 | 42,9  | 1,91                 | 46    | 4,76                 | 284                  |
| 22 | 0,09                 | 0,7↓ | 0,03                 | 0,2  | 0,98↑                | 8     | 7,32                 | 60,1↑ | 3,78                 | 31    | 4,7                  | 446                  |
| 23 | 0,08↓                | 1,6↓ | 0,03                 | 0,6  | 0,45                 | 8,9↑  | 2,45                 | 48,7  | 2,02                 | 40,2  | 4,53                 | 242                  |
| 24 | 0,11                 | 1,9  | 0,05                 | 0,9  | 0,46                 | 7,9   | 2,98                 | 50,9↑ | 2,24                 | 38,4↓ | 4,52                 | 172                  |
| 25 | 0,09                 | 0,9↓ | 0,12↑                | 1,1↑ | 0,51                 | 4,8   | 5,18                 | 49,3↑ | 4,62                 | 43,9  | 4,42                 | 388                  |
| 26 | 0,11                 | 1,2↓ | 0,05                 | 0,5  | 1,09↑                | 12↑   | 5,08                 | 55,8  | 2,78                 | 30,5  | 4,49                 | 250                  |
| 27 | 0,07↓                | 1,9↓ | 0,06                 | 1,7↑ | 0,4                  | 11,1↑ | 1,4                  | 39,1↑ | 1,66↓                | 46,2  | 4,81                 | 259                  |
| 28 | 0,01↓                | 0,2↓ | 0,19↑                | 3↑   | 0,4                  | 6,3   | 2,96                 | 46,8  | 2,76                 | 43,7  | 4,83                 | 330                  |
| 29 | 0,19                 | 3    | 0,06                 | 0,9  | 0,98↑                | 15,4↑ | 2,68                 | 42,1  | 2,46                 | 38,6  | 5,65↑                | 117                  |
| 30 | 0,82↑                | 9,1↑ | 0,08                 | 0,9  | 0,69                 | 7,6   | 4,3                  | 47,5  | 3,16                 | 34,9  | 4,71                 | 264                  |

↑ - abnormal value, increased; ↓ - abnormal value, decreased; normal values are found in the supplementary table 7.

**Supplementary Table 5S.** Demographic and clinical data of patients with Down syndrome. According to their registration form they did not presented thyroid dysfunction, but we could not have access to the thyroid function results.

| <b>ID</b> | <b>Age (month)</b> | <b>Sex</b> |
|-----------|--------------------|------------|
| 31        | 98                 | F          |
| 32        | 26                 | M          |
| 33        | 37                 | F          |
| 34        | 136                | F          |
| 35        | 177                | M          |
| 36        | 96                 | M          |
| 37        | 67                 | F          |
| 38        | 22                 | M          |
| 39        | 119                | F          |
| 40        | 94                 | M          |

*M – male; F – female.*

**Supplementary Table 6S.** Cell blood count of patients with Down syndrome

| ID | Eosinophils          |      | Basophils            |     | Monocytes            |       | Neutrophils          |       | Lymphocytes          |       | Erythrocytes         | Platelets            |
|----|----------------------|------|----------------------|-----|----------------------|-------|----------------------|-------|----------------------|-------|----------------------|----------------------|
|    | x10 <sup>3</sup> /ul | %    | x10 <sup>3</sup> /ul | %   | x10 <sup>3</sup> /ul | %     | x10 <sup>3</sup> /ul | %     | x10 <sup>3</sup> /ul | %     | x10 <sup>6</sup> /ul | x10 <sup>3</sup> /ul |
| 31 | 0,13                 | 2,2  | 0,06                 | 1   | 0,52                 | 9↑    | 2,64                 | 45,5  | 2,46                 | 42,3  | 5,05                 | 256                  |
| 32 | 0↓                   | 0↓   | 0,03                 | 0,2 | 0,58                 | 3,7   | 14,04↑               | 90↑   | 0,95↑                | 6,1   | 4,34                 | 185                  |
| 33 | 0,09                 | 0,6↓ | 0,05                 | 0,3 | 0,46                 | 3,1   | 12,29↑               | 84,2↑ | 1,72↓                | 11,8↓ | 4,15                 | 210                  |
| 34 | 0,04↓                | 0,7↓ | 0,12↑                | 2↑  | 0,54                 | 9,2↑  | 2,34                 | 39,7  | 2,85                 | 48,4  | 4,57                 | 272                  |
| 35 | 0,07↓                | 0,8↓ | 0,07                 | 0,8 | 0,55                 | 6,6   | 6,41                 | 76,9  | 1,24                 | 14,9  | 4,67                 | 214                  |
| 36 | 0,05↓                | 1,2↓ | 0,03                 | 0,7 | 0,85                 | 19,9↑ | 1,69                 | 39,4  | 1,66↓                | 38,8↓ | 4,14                 | 289                  |
| 37 | 0↓                   | 0↓   | 0,02                 | 0,2 | 0,47                 | 4,4   | 9,48↑                | 88↑   | 0,8↓                 | 7,4↓  | 4,2                  | 369                  |
| 38 | 0,24                 | 1,1↓ | 0,06                 | 0,3 | 1,14↑                | 5,3   | 7,76↑                | 35,9  | 12,4↑                | 57,4  | 4,35                 | 393                  |
| 39 | 0,01↓                | 0,2↓ | 0,01                 | 0,2 | 0,56                 | 9,7↑  | 4,76                 | 82,1↑ | 0,45↓                | 7,8↓  | 3,87↓                | 179                  |
| 40 | 0,01↓                | 0,1↓ | 0,01                 | 0,1 | 0,5                  | 5,6   | 7,71↑                | 87↑   | 0,64↓                | 7,2↓  | 4,43                 | 165                  |

↑- abnormal value, increased; ↓- abnormal value, decreased; normal values are found in the supplementary table 7.

**Supplementary Table 7.** Normal values for cells blood count in peripheral blood.

| Age (month)    | Eosinophils          |     | Basophils            |     | Monocytes            |     | Neutrophils          |       | Lymphocytes          |       |
|----------------|----------------------|-----|----------------------|-----|----------------------|-----|----------------------|-------|----------------------|-------|
|                | x10 <sup>3</sup> /ul | %     | x10 <sup>3</sup> /ul | %     |
| <b>&lt; 12</b> | 0,1-1,02             | 2-6 | 0-0,1                | 0-1 | 0,1-1,36             | 2-8 | 0,95-7,6             | 19-45 | 2,3-12,92            | 46-76 |
| <b>12-60</b>   | 0,08-0,48            | 2-4 | 0-0,1                | 0-1 | 0,08-0,96            | 2-8 | 0,72-5,28            | 18-44 | 1,84-9,12            | 46-76 |
| <b>72-156</b>  | 0,09-0,43            | 2-4 | 0-0,1                | 0-1 | 0,09-0,86            | 2-8 | 1,77-7,08            | 37-65 | 1,23-5,4             | 27-50 |
| <b>168-216</b> | 0,09-0,43            | 2-4 | 0-0,1                | 0-1 | 0,09-0,86            | 2-8 | 1,87-8,1             | 39-75 | 1,2-4,86             | 25-45 |

**Supplementary Table 8.** Normal values for thyroid function.

| Age (month)    | TSH (uUI/ml) | FT4 (pmol/l) | FT3 (pmol/l) |
|----------------|--------------|--------------|--------------|
| <b>&lt;12</b>  | 0,62-8,05    | 6,2-30,1     | 2,4-9,8      |
| <b>12-60</b>   | 0,54-4,53    | 11-22,5      | 3-9,1        |
| <b>72-108</b>  | 0,66-4,14    | 11,6-21,5    | 4,1-7,9      |
| <b>120-216</b> | 0,53-3,59    | 12-20,6      | 3,5-7,7      |

*TSH – thyroid stimulating hormone; FT3 – free triiodothyronine; FT4 – free thyroxine.*
